# Supplementary material
Source: PubMed Central journal article supplement (PMC3442952)

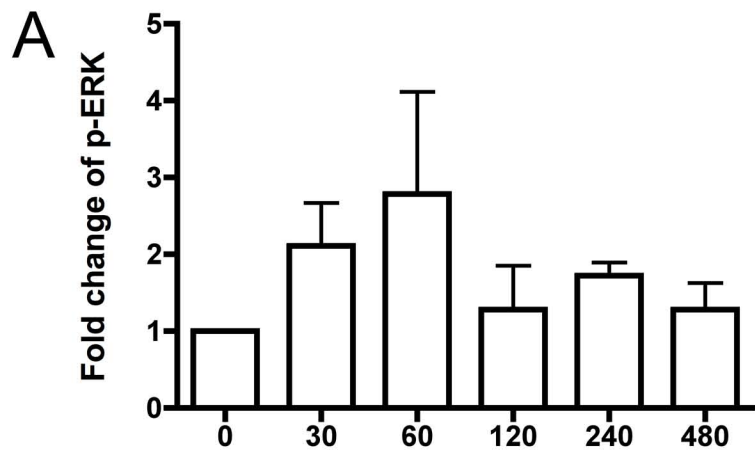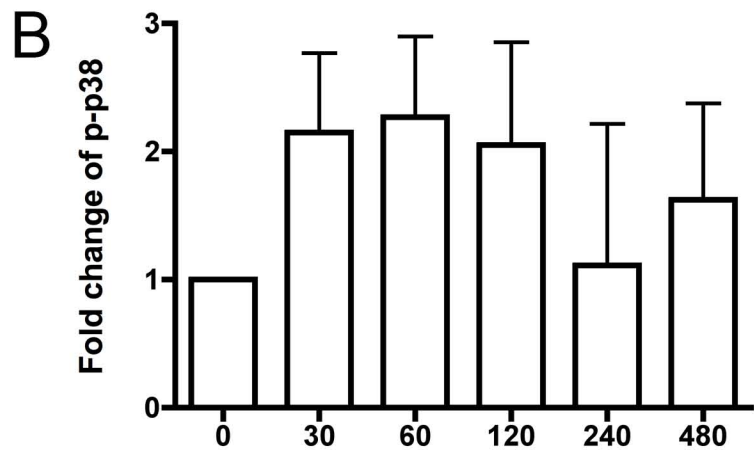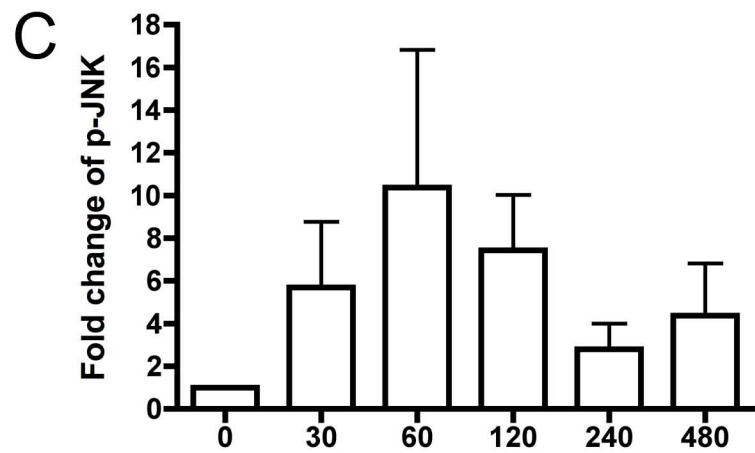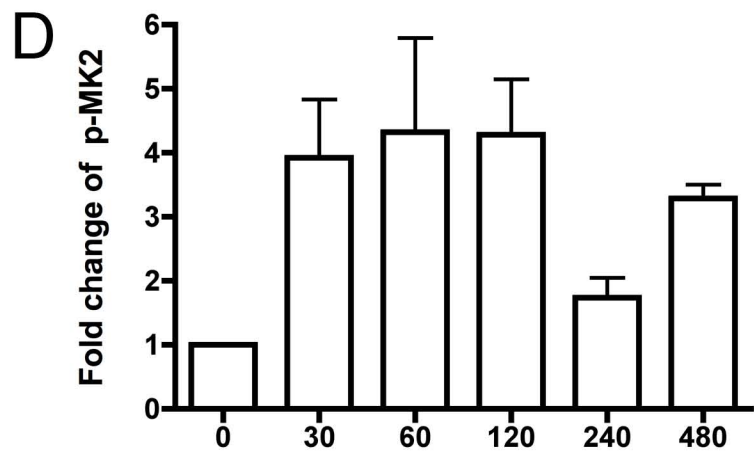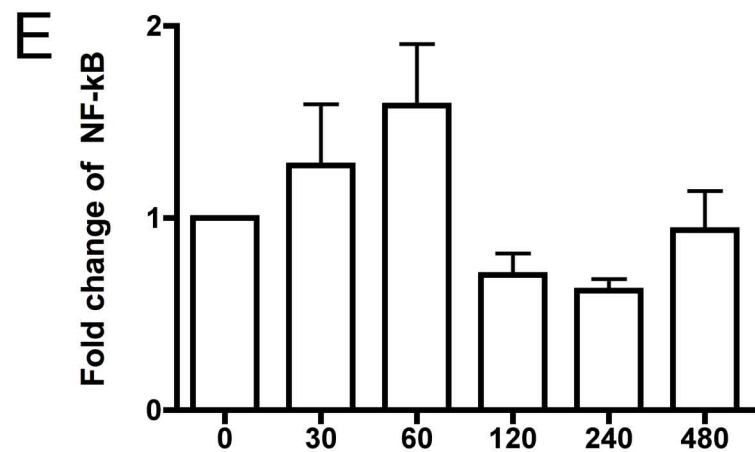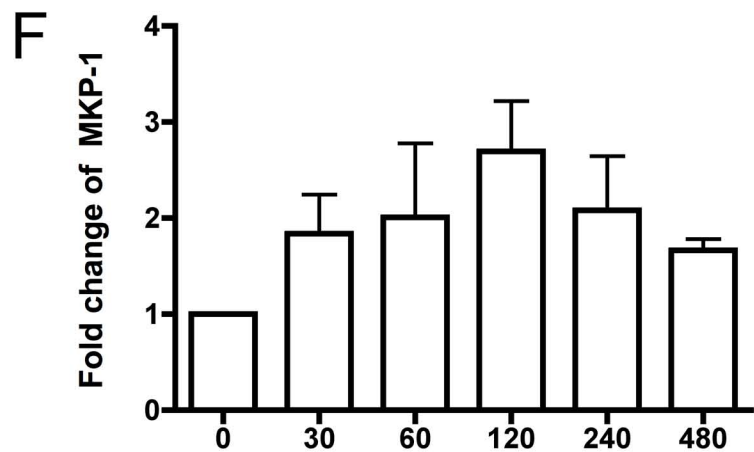

Supplement: NIHMS381091-supplement-Supp_Fig_S1.pdf [file NIHMS381091-supplement-Supp_Fig_S1.pdf]
